# Supplementary material for: Medical Researchers’ Ethical Awareness of Transgenic Monkeys with Human Genes: A Quantitative Case Study from China
Source: Research Square preprint supplement (doi:10.21203/rs.3.rs-333841/v1), 2021-03-30
Supplement: Supplementary file 1 [file 49704275f25664c73a7ea7b8.xlsx]

## Sheet: 表3-3 您同意只要通过所在机构伦理委员会批准通过，就可以开展
表3-3 您同意只要通过所在机构伦理委员会批准通过，就可以开展吗？
		同意	不同意
总计		31.1	68.9
性别	男	31.2	68.8
	女	31	69
最高学历	本科及以下	36.1	63.9
	硕士研究生	28.7	71.3
	博士研究生	31.6	68.4
专业技术职称	初级及以下	25.4	74.6
	中级	29	71
	副高级	32.4	67.6
	正高级	33.6	66.4
单位类型	科研院所	37.6	62.4
	医疗机构	28.4	71.6
	高校	34.6	65.4
	企业及其他	32.4	67.6
海外经历	无	29	71
	有	33.3	66.7

## Sheet: Table S4
Supplementary Material-Table S4 Do you agree that it can be carried out as long as it is approved by the ethics committee of your organization?
		Agree	Disagree
Overall data		0.311	0.689
Sex	Male	0.312	0.688
	Female	0.31	0.69
Age (yr)	≤35	0.272	0.728
	36-45	0.344	0.656
	46-55	0.322	0.678
	＞55	0.304	0.696
Educational background	Undergraduate	0.361	0.639
	Master	0.287	0.713
	Ph.D.	0.316	0.684
Profession	Basic medicine	0.346	0.654
	Clinical medicine	0.28	0.72
	Preventive medicine and public health	0.33	0.67
	Military medicine and specializations	0.267	0.733
	Pharmacology	0.343	0.657
	Traditional medicine and pharmaceutics	0.297	0.703
	Other	0.351	0.649
Professional level	Primary	0.254	0.746
	Middle	0.29	0.71
	Associate	0.324	0.676
	Professor	0.336	0.664
Province	Eastern	30.5%	0.695
	Central	0.303	0.697
	Western	0.33	0.67
	North eastern	0.334	0.666
Type of institution	Institute of science and technology	0.376	0.624
	Hospital	0.284	0.716
	University	0.346	0.654
	Private company	0.324	0.676
